# Supplementary material for: On-chip immunomagnetic separation of allergens from myofibrillar proteins of seafoods for rapid allergy tests
Source: Royal Society of Chemistry journal article supplement (doi:10.1039/d2an00813k), 2022-01-01
Supplement: d2an00813k1.pdf [file d2an00813k1.pdf]

**Electronic Supporting Information (ESI) for:**

**On-chip immunomagnetic separation of allergens from  
myofibrillar proteins of seafoods for rapid allergy test**

Li Wang, Hongyan Bi\*

College of Food Science and Engineering, Shanghai Ocean University, Hucheng Ring  
Road 999, Pudong New District, 201306 Shanghai, China

\*, To whom correspondence should be addressed. Tel.: +86-21-61900364; Fax: +86-  
21-61900365; E-mail address: [hybi@shou.edu.cn](mailto:hybi@shou.edu.cn)

E-mail addresses for the other authors: [lwang1210@qq.com](mailto:lwang1210@qq.com)

## **S1. Extraction of myofibrillar protein from shrimp and crab samples**

Myofibrillar protein was extracted from shrimp samples with reference to a published report, and slightly modified.<sup>1</sup> Briefly, shrimp samples were thawed at 4 °C, peeled and beheaded. 6 g of the obtained muscle was minced and homogenized with 20 mL of 10 mM PBS (pH 7.4) in a ratio of 1:10 (v/v), followed by centrifuged at 12,000 g for 10 min at 4 °C. The precipitate was resuspended in 10 mM PBS (pH 7.4) and serially centrifuged (12,000 g for 10 min at 4°C) four times with PBS buffer (10 mM, pH 7.4). The resultant precipitate was supposed to be the myofibrillar protein, which was collected and resuspended in 0.1 M Tris-HCl buffer (pH 7.5) containing 0.5 M NaCl for further use.

For protein extraction from crab samples, a published report was referred to with some modifications made.<sup>2</sup> Muscle tissue from the crab claw was taken out, and 5 g of muscle sample was mixed with 25 mL of PBS (0.01 M, pH 7.4), and homogenized for 2 min. Next, centrifugation of sample was carried out at 7,000 g and 4 °C for 30 min. Then, the filtrate was centrifuged at 15,000 g and 4 °C for 15 min, to obtain the supernatant that contains the myofibrillar protein extracts for later use.

## References

1. Y. Yang, H. F. Yan, Y. X. Zhang, H. L. Chen, M. J. Cao, M. S. Li, M. L. Zhang, X. R. He and G. M. Liu, *Food Chem*, 2020, **317**, 126422.
2. C. C. Wu, C. H. Lee, Y. C. Tyan, E. S. Huang, W. T. Yu and H. S. Yu, *Food Chem*, 2019, **289**, 413-418.
